# Supplementary material for: Autoimmune diseases and their genetic link to bronchiectasis: insights from a genetic correlation and Mendelian randomization study
Source: PubMed Central journal article supplement (PMC11039849; doi:10.3389/fimmu.2024.1343480), 2024-04-10
Supplement: Table_1.pdf [file Table_1.pdf]

**Table 1. Power calculations for bidirectional univariable Mendelian randomization analyses**

| Exposure                             | SNPs | Outcome        | Proportion of variance in the exposure explained by the instrument ( $R^2$ ) | F-statistic | Power |
|--------------------------------------|------|----------------|------------------------------------------------------------------------------|-------------|-------|
| Crohn's disease (CD)                 | 76   | Bronchiectasis | 77.97%                                                                       | 81.31       | 12%   |
| Celiac disease (CeD)                 | 15   | Bronchiectasis | 85.92%                                                                       | 285.82      | 96%   |
| Multiple sclerosis (MS)              | 48   | Bronchiectasis | 46.59%                                                                       | 70.55       | 62%   |
| Rheumatoid arthritis (RA)            | 83   | Bronchiectasis | 112.52%                                                                      | 112.26      | 100%  |
| Systemic lupus erythematosus (SLE)   | 40   | Bronchiectasis | 142.93%                                                                      | 98.22       | 10%   |
| Ulcerative colitis (UC)              | 56   | Bronchiectasis | 49.67%                                                                       | 69.25       | 44%   |
| Type 1 diabetes (T1D)                | 38   | Bronchiectasis | 185.27%                                                                      | 116.39      | 92%   |
| Psoriasis (PsO)                      | 61   | Bronchiectasis | 1535.64%                                                                     | 72.29       | 18%   |
| Primary sclerosing cholangitis (PSC) | 17   | Bronchiectasis | 107.71%                                                                      | 130.09      | 39%   |
| Primary biliary cirrhosis (PBC)      | 34   | Bronchiectasis | 87.04%                                                                       | 105.91      | 46%   |
| Ankylosing spondylitis (AS)          | 24   | Bronchiectasis | 2.59%                                                                        | 127.18      | 5%    |
| Vitiligo (ViT)                       | 35   | Bronchiectasis | 83.83%                                                                       | 63.64       | 12%   |
