# Supplementary material for: Autoimmune diseases and their genetic link to bronchiectasis: insights from a genetic correlation and Mendelian randomization study
Source: PubMed Central journal article supplement (PMC11039849; doi:10.3389/fimmu.2024.1343480), 2024-04-10
Supplement: Table_2.pdf [file Table_2.pdf]

**Table 2** Genetic Correlation Estimates for autoimmune diseases and BE by LDSC regression

| <b>Exposure</b>                      | <b>Outcome</b>                      | <b>Genetic correlation(rg)</b> | <b>rg (SE)</b>           | <b>P</b>                 |
|--------------------------------------|-------------------------------------|--------------------------------|--------------------------|--------------------------|
| Crohn's disease (CD)                 |                                     | 0.220                          | 0.105                    | 0.037                    |
| Celiac disease (CeD)                 |                                     | 0.331                          | 0.314                    | 0.292                    |
| Multiple sclerosis (MS)              |                                     | 0.236                          | 0.242                    | 0.330                    |
| Rheumatoid arthritis (RA)            |                                     | 0.210                          | 0.091                    | 0.021                    |
| Systemic lupus erythematosus (SLE)   |                                     | 0.166                          | 0.162                    | 0.304                    |
| Ulcerative colitis (UC)              | Bronchiectasis                      | 0.247                          | 0.109                    | 0.023                    |
| Type 1 diabetes (T1D)                | (BE)                                | -0.187                         | 0.195                    | 0.337                    |
| Psoriasis (PsO)                      |                                     | 0.468                          | 0.310                    | 0.131                    |
| Primary sclerosing cholangitis (PSC) |                                     | -0.116                         | 0.150                    | 0.441                    |
| Primary biliary cirrhosis (PBC)      |                                     | 0.288                          | 0.178                    | 0.106                    |
| Ankylosing spondylitis (AS)          |                                     | 0.596                          | 0.370                    | 0.107                    |
| Vitiligo (ViT)                       |                                     | 0.380                          | 0.478                    | 0.426                    |
| <b>Phenotype</b>                     | <b>Heritability (h<sup>2</sup>)</b> | <b>h<sup>2</sup> (SE)</b>      | <b>h<sup>2</sup> (Z)</b> | <b>h<sup>2</sup> (P)</b> |
| Crohn's disease (CD)                 | 33.90%                              | 0.035                          | 9.743                    | 0.000                    |
| Celiac disease (CeD)                 | 76.72%                              | 0.316                          | 2.430                    | 0.015                    |
| Multiple sclerosis (MS)              | 132.25%                             | 0.202                          | 6.531                    | 0.000                    |
| Rheumatoid arthritis (RA)            | 4.14%                               | 0.008                          | 5.495                    | 0.000                    |
| Systemic lupus erythematosus (SLE)   | 49.96%                              | 0.085                          | 5.886                    | 0.000                    |
| Ulcerative colitis (UC)              | 21.55%                              | 0.027                          | 7.975                    | 0.000                    |
| Type 1 diabetes (T1D)                | 5.48%                               | 0.169                          | 0.057                    | 2.960                    |
| Psoriasis (PsO)                      | 57.23%                              | 0.133                          | 4.306                    | 0.000                    |
| Primary sclerosing cholangitis (PSC) | 36.06%                              | 0.122                          | 2.961                    | 0.003                    |
| Primary biliary cirrhosis (PBC)      | 37.00%                              | 0.060                          | 6.130                    | 0.000                    |
| Ankylosing spondylitis (AS)          | 232.99%                             | 0.619                          | 3.762                    | 0.000                    |
| Vitiligo (ViT)                       | 0.10%                               | 0.001                          | 0.925                    | 0.355                    |
| Bronchiectasis (BE)                  | 0.32%                               | 0.001                          | 2.568                    | 0.010                    |
