# Supplementary material for: Autoimmune diseases and their genetic link to bronchiectasis: insights from a genetic correlation and Mendelian randomization study
Source: PubMed Central journal article supplement (PMC11039849; doi:10.3389/fimmu.2024.1343480), 2024-04-10
Supplement: Table_3.pdf [file Table_3.pdf]

**Table 3.** Summary of LDSC analysis results

| <b>Genetic Correlation(rg) Result Summary</b>      |          |        |       |          |          |          |          |        |          |          |          |        |        |
|----------------------------------------------------|----------|--------|-------|----------|----------|----------|----------|--------|----------|----------|----------|--------|--------|
| <b>Phenotypes</b>                                  | CD       | CeD    | MS    | RA       | SLE      | UC       | T1D      | PsO    | PSC      | PBC      | AS       | ViT    | BE     |
| Crohn's disease (CD)                               | NA       | 0.356  | 0.500 | 0.035    | 0.106    | 0.627    | -0.054   | 0.487  | 0.155    | 0.178    | 1.444    | 0.111  | 0.220  |
| Celiac disease (CeD)                               | 0.356    | NA     | 0.049 | 0.283    | 0.302    | 0.172    | 0.477    | -0.008 | 0.116    | 0.002    | 0.029    | 0.842  | 0.331  |
| Multiple sclerosis (MS)                            | 0.500    | 0.049  | NA    | 0.292    | 0.437    | 0.640    | 0.510    | 0.030  | 0.677    | 0.978    | 0.204    | 0.289  | 0.236  |
| Rheumatoid arthritis (RA)                          | 0.035    | 0.283  | 0.292 | NA       | 0.391    | 0.146    | 0.309    | 0.170  | 0.108    | 0.276    | 0.381    | -0.212 | 0.210  |
| Systemic lupus erythematosus (SLE)                 | 0.106    | 0.302  | 0.437 | 0.391    | NA       | 0.220    | 0.387    | -0.008 | 0.282    | 0.331    | 0.200    | 0.218  | 0.166  |
| Ulcerative colitis (UC)                            | 0.627    | 0.172  | 0.640 | 0.146    | 0.220    | NA       | 0.110    | 0.438  | 0.480    | 0.254    | 1.426    | -0.050 | 0.247  |
| Type 1 diabetes (T1D)                              | -0.054   | 0.477  | 0.510 | 0.309    | 0.387    | 0.110    | NA       | 0.025  | 0.490    | 0.187    | -0.264   | -0.059 | -0.187 |
| Psoriasis (PsO)                                    | 0.487    | -0.008 | 0.030 | 0.170    | -0.008   | 0.438    | 0.025    | NA     | -0.051   | 0.330    | 0.141    | -0.637 | 0.468  |
| Primary sclerosing cholangitis (PSC)               | 0.155    | 0.116  | 0.677 | 0.108    | 0.282    | 0.480    | 0.490    | -0.051 | NA       | 0.164    | 0.277    | 0.096  | -0.116 |
| Primary biliary cirrhosis (PBC)                    | 0.178    | 0.002  | 0.978 | 0.276    | 0.331    | 0.254    | 0.187    | 0.330  | 0.164    | NA       | 0.561    | -0.357 | 0.288  |
| Ankylosing spondylitis (AS)                        | 1.444    | 0.029  | 0.204 | 0.381    | 0.200    | 1.426    | -0.264   | 0.141  | 0.277    | 0.561    | NA       | -0.629 | 0.596  |
| Vitiligo (ViT)                                     | 0.111    | 0.842  | 0.289 | -0.212   | 0.218    | -0.050   | -0.059   | -0.637 | 0.096    | -0.357   | -0.629   | NA     | 0.380  |
| Bronchiectasis (BE)                                | 0.220    | 0.331  | 0.236 | 0.210    | 0.166    | 0.247    | -0.187   | 0.468  | -0.116   | 0.288    | 0.596    | 0.380  | NA     |
| <b>Genetic Correlation(rg) Pval Result Summary</b> |          |        |       |          |          |          |          |        |          |          |          |        |        |
| <b>Phenotypes</b>                                  | CD       | CeD    | MS    | RA       | SLE      | UC       | T1D      | PsO    | PSC      | PBC      | AS       | ViT    | BE     |
| Crohn's disease (CD)                               | NA       | 0.023  | 0.016 | 0.467    | 0.086    | 3.60E-17 | 0.458    | 0.025  | 0.026    | 0.010    | 4.09E-07 | 0.532  | 0.037  |
| Celiac disease (CeD)                               | 0.023    | NA     | 0.453 | 0.196    | 0.162    | 0.323    | 0.063    | 0.932  | 0.728    | 0.993    | 0.772    | 0.106  | 0.292  |
| Multiple sclerosis (MS)                            | 0.016    | 0.453  | NA    | 0.138    | 0.038    | 0.002    | 0.121    | 0.724  | 0.004    | 0.006    | 0.048    | 0.447  | 0.330  |
| Rheumatoid arthritis (RA)                          | 0.467    | 0.196  | 0.138 | NA       | 9.53E-10 | 0.006    | 1.17E-04 | 0.392  | 0.061    | 7.65E-06 | 0.053    | 0.210  | 0.021  |
| Systemic lupus erythematosus (SLE)                 | 0.086    | 0.162  | 0.038 | 9.53E-10 | NA       | 7.38E-05 | 0.033    | 0.971  | 0.079    | 0.002    | 0.440    | 0.368  | 0.304  |
| Ulcerative colitis (UC)                            | 3.60E-17 | 0.323  | 0.002 | 0.006    | 7.38E-05 | NA       | 0.153    | 0.067  | 3.88E-06 | 1.80E-04 | 6.33E-08 | 0.786  | 0.023  |
| Type 1 diabetes (T1D)                              | 0.458    | 0.063  | 0.121 | 1.17E-04 | 0.033    | 0.153    | NA       | 0.931  | 0.036    | 0.173    | 0.441    | 0.859  | 0.337  |
| Psoriasis (PsO)                                    | 0.025    | 0.932  | 0.724 | 0.392    | 0.971    | 0.067    | 0.931    | NA     | 0.849    | 0.298    | 0.278    | 0.276  | 0.131  |
| Primary sclerosing cholangitis (PSC)               | 0.026    | 0.728  | 0.004 | 0.061    | 0.079    | 3.88E-06 | 0.036    | 0.849  | NA       | 0.152    | 0.296    | 0.710  | 0.441  |
| Primary biliary cirrhosis (PBC)                    | 0.010    | 0.993  | 0.006 | 7.65E-06 | 0.002    | 1.80E-04 | 0.173    | 0.298  | 0.152    | NA       | 0.131    | 0.173  | 0.106  |
| Ankylosing spondylitis (AS)                        | 4.09E-07 | 0.772  | 0.048 | 0.053    | 0.440    | 6.33E-08 | 0.441    | 0.278  | 0.296    | 0.131    | NA       | 0.249  | 0.107  |
| Vitiligo (ViT)                                     | 0.532    | 0.106  | 0.447 | 0.210    | 0.368    | 0.786    | 0.859    | 0.276  | 0.710    | 0.173    | 0.249    | NA     | 0.426  |
| Bronchiectasis (BE)                                | 0.037    | 0.292  | 0.330 | 0.021    | 0.304    | 0.023    | 0.337    | 0.131  | 0.441    | 0.106    | 0.107    | 0.426  | NA     |
